# Supplementary figures and images for: Effect of Bifidobacterium bifidum on Clinical Characteristics and Gut Microbiota in Attention-Deficit/Hyperactivity Disorder
Source: MDPI journal article supplement (doi:10.3390/jpm12020227), 2022-02-07

**A**

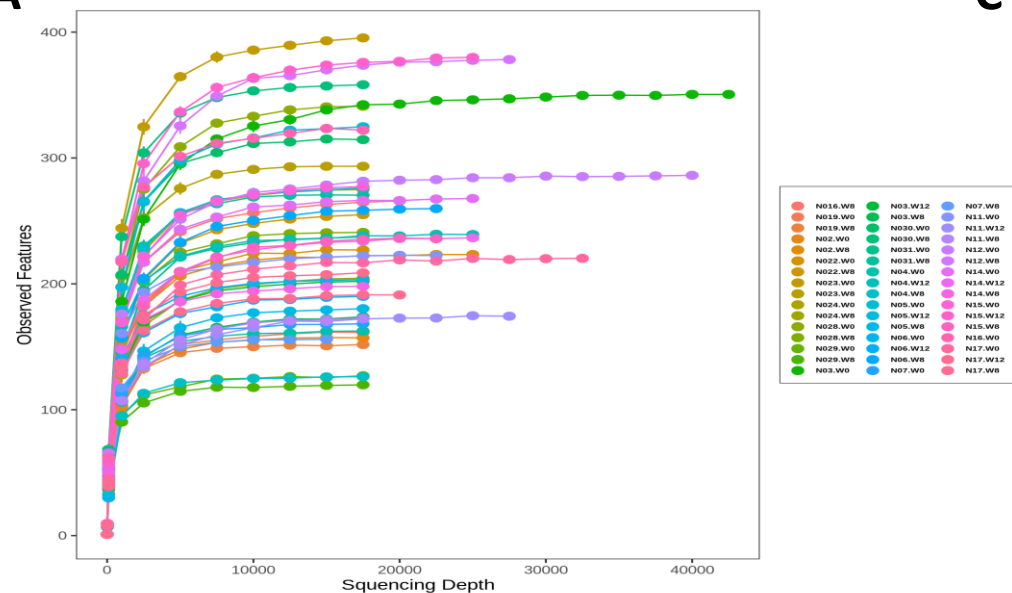

# B

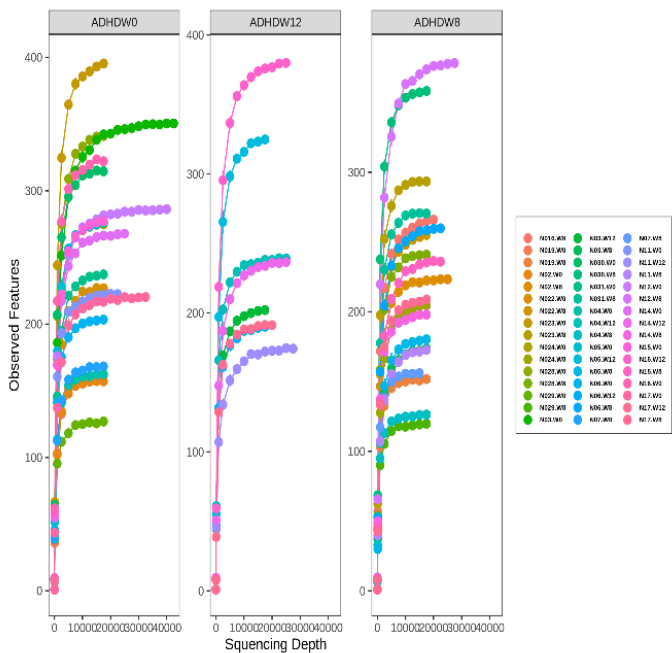

C

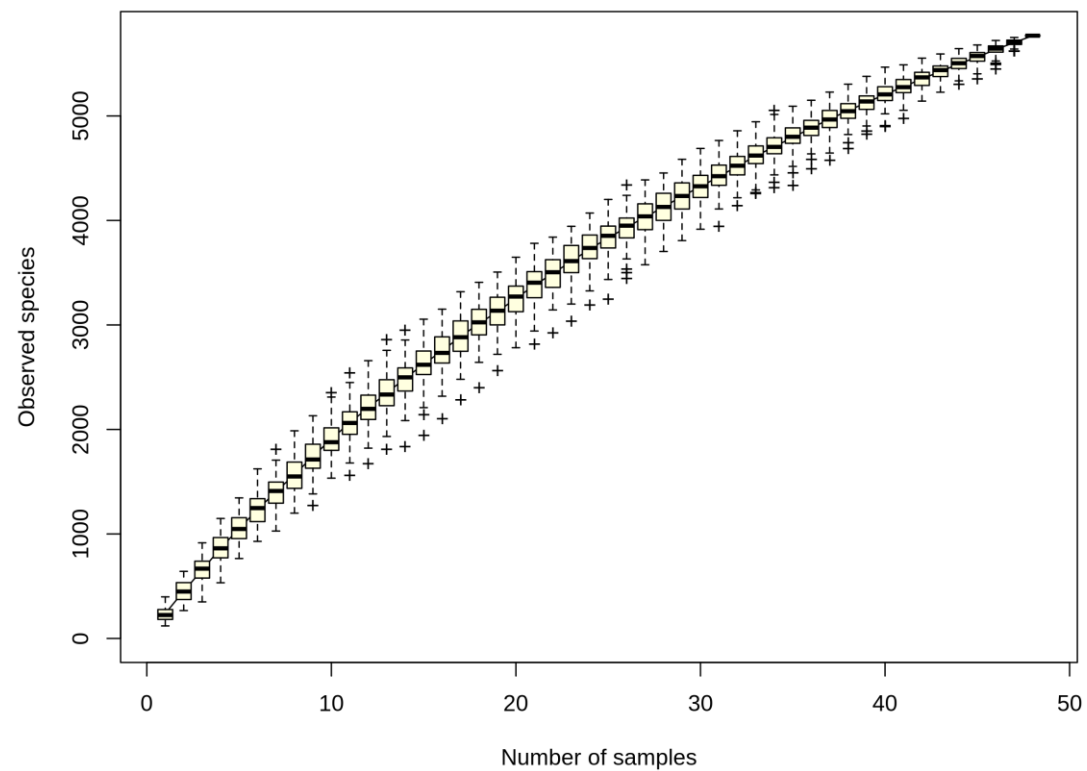

Figure S2

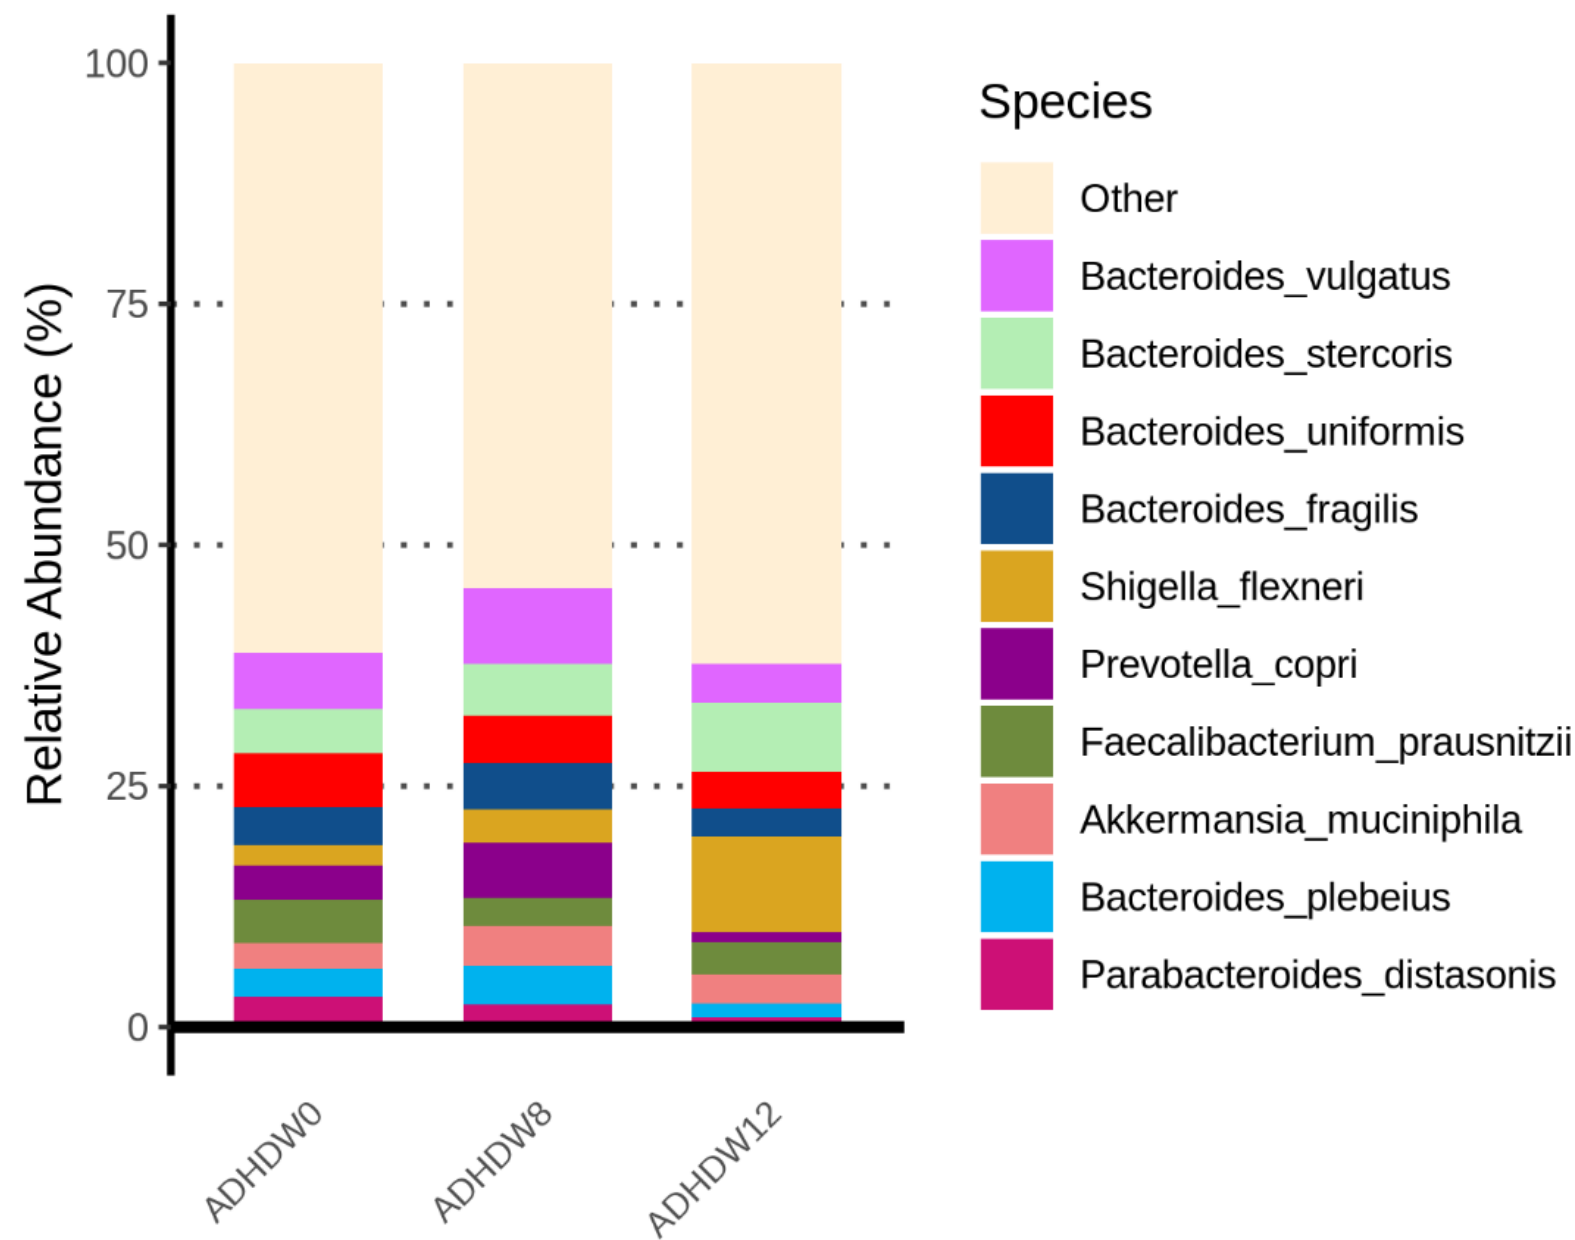

Supplement: s1 [file s1]
